# Supplementary material for: Transfected plasmid DNA is incorporated into the nucleus via nuclear envelope reformation at telophase
Source: Research Square preprint supplement (doi:10.21203/rs.3.rs-478612/v1), 2021-07-01
Supplement: Supplementary file 1 [file 3655becfd92ae10a257c5e28.xlsx]

## Sheet: HeLa_iBAF 
				HeLa cells were treated with siRNA iBAF, and transfected with pEF1alpha-mRFP. RFP expression was observed by microscopy.
				Time (min) of RFP ecpression after onset of chromosome segregation
	sample	time (min)			time (min)	cell number
	2	150	150		0	0
		150	150		10	0
		200	200		20	0
		160	160		30	0
		200	200		40	0
		320	410		50	0
		160	170		60	0
	3	170	170		70	0
		130	130		80	0
	4	130	130		90	0
	5	120	120		100	2
		160	170		110	0
	7	120	120		120	6
		120	120		130	18
		190	190		140	7
	8	210	200		150	12
		130	130		160	9
		310	310		170	12
		300	300		180	11
		200	200		190	10
	9	100	100		200	14
		150	150		210	3
	10	330	-		220	4
		150	-		230	9
	11	180	180		240	0
		300	300		250	1
		150	150		260	1
		200	200		270	3
	12	190	180		280	3
		140	140		290	1
		230	230		300	5
		300	-		310	2
	13	130	130		320	1
		270	280		330	1
		230	220		340	0
		140	140		350	0
		280	-		360	0
	14	160	160		370	0
		170	200		380	0
		140	160		390	0
		250	280		400	0
	15	220	230		410	1
		170	170		420	0
		230	230		430	0
		160	160		440	0
		200	200		450	0
	16	190	190		460	0
	17	150	150		470	0
		150	-		480	0
		270	290
	18	170	170
		230	230		SUM	136
		230	-
	20	210	210
		260	270
		130	130
		180	180
		220	220
		190	190
	21	180	180
		190	200
		170	180
		180	190
	22	140	140
		170	170
	23	130	130
		130	130
		130	130
		130	130
	24	180	180
		190	200
	cell number		136
	SUM		25410
	AVE		186.838
	MEDIAN		180

## Sheet: HeLa_iLuci 
				HeLa cells were treated with control siRNA iLuc, and transfected with pEF1alpha-mRFP. RFP expression was observed by microscopy.
				Time (min) of RFP ecpression after onset of chromosome segregation
	sample	time (min)			time (min)	cell number
	1	130	130		0	0
		160	160		10	0
		190	190		20	0
	2	90	90		30	0
	3	110	130		40	0
		140	-		50	0
		110	110		60	0
		130	130		70	0
	4	280	310		80	0
		110	110		90	3
	5	130	130		100	7
		140	140		110	10
		160	170		120	18
		140	140		130	17
	6	240	260		140	19
		240	240		150	1
		120	120		160	8
		120	130		170	9
		380	430		180	2
	7	120	120		190	9
		140	170		200	0
		120	130		210	1
		140	140		220	1
	8	130	130		230	1
		170	170		240	3
		180	180		250	1
	9	140	160		260	5
		120	130		270	0
	10	190	190		280	1
		160	170		290	0
	11	250	-		300	0
	12	190	-		310	2
	13	120	120		320	0
		360	430		330	0
		260	260		340	0
		190	190		350	3
	14	140	160		360	2
		120	120		370	0
		120	-		380	1
	15	120	120		390	0
		410	410		400	0
		170	220		410	2
	16	170	170		420	0
	17	150	160		430	3
		170	230		440	0
	18	140	140		450	0
		430	260		460	0
		130	130		470	0
		350	-		480	0
		120	120		490	0
	19	310	360		500	0
	20	100	110
		130	130
		140	140		SUM	129
		210	220
	21	90	100
		100	100
		260	-
	23	140	140
		100	100
		110	160
	24	100	-
		130	140
		190	190
		140	140
	25	110	110
		350	350
		120	120
	cell number		129
	SUM		22330
	AVE		173.101
	MEDIAN		140
