# Supplementary material for: Transfected plasmid DNA is incorporated into the nucleus via nuclear envelope reformation at telophase
Source: Research Square preprint supplement (doi:10.21203/rs.3.rs-478612/v1), 2021-07-01
Supplement: Supplementary file 2 [file 55382e7e19717a429ae25fe8.xlsx]

## Sheet: IAA
				HeLa/mClover3-mAid-lem2 (clone 1-1) cell were transfected with pEF1α-mRFP for 4h, and RFP expression wasobserved by microscopy.
				Time (minutes) of mRFP expression after the onset of chromosome segregation
	sample	time (min)
	1	130	130		time (min)	cell number
		165	165		ー
		135	135		80	0
		165	165		85	0
	2	95	95		90	0
		120	120		95	2
		135	135		100	0
		120	120		105	6
		180	180		110	0
		240	240		115	2
		135	135		120	30
		150	150		125	0
	3	105	105		130	4
		115	115		135	24
		210	285		140	2
		210	210		145	2
		285	285		150	6
	4	120	120		155	0
		120	120		160	2
		165	165		165	18
		120	120		170	0
	5	120	120		175	0
		180	180		180	10
		120	120		185	0
		120	120		190	0
	6	165	165		195	2
		165	165		200	0
		180	180		205	0
	7	150	150		210	3
		120	120		215	0
		135	135		220	0
		135	135		225	2
	8	120	120		230	0
		120	120		235	0
		165	165		240	6
		135	135		245	0
		120	120		250	1
	9	180	180		255	0
		105	105		260	0
		180	180		265	0
	10	160	160		270	0
		145	145		275	0
		135	135		280	1
		240	240		285	3
		225	225		SUM	126
		105	105
		120	120
		120	120
	11	250	280
		140	140
		120	120
		135	135
		135	135
		165	165
	12	130	130
		165	165
		135	135
		165	165
	13	150	150
		135	135
		195	195
	14	240	240
		135	135
	cell number		126
	SUM		19265
	AVE		152.897
	MEDIAN		135

## Sheet: control&IAA
		control(n=162)	IAA(n=126)
	80	0	0
	85	0	0
	90	3	0
	95	2	2
	100	5	0
	105	13	6
	110	2	0
	115	0	2
	120	33	30
	125	2	0
	130	6	4
	135	19	24
	140	1	2
	145	1	2
	150	17	6
	155	0	0
	160	0	2
	165	17	18
	170	0	0
	175	1	0
	180	10	10
	185	0	0
	190	2	0
	195	5	2
	200	0	0
	205	0	0
	210	2	3
	215	0	0
	220	0	0
	225	3	2
	230	0	0
	235	0	0
	240	4	6
	245	0	0
	250	0	1
	255	4	0
	260	0	0
	265	0	0
	270	4	0
	275	1	0
	280	0	1
	285	3	3
	295	0	0
	300	1	0
	305	0	0
	310	0	0
	315	0	0
	320	0	0
	325	0	0
	330	1	0
	335	0	0
	345	0	0
	350	0	0
		n(%)	n(%)
	no expression	11(6.4%)	20(13.7%)

## Sheet: control
				mClover3-mAid-lem2 (clone 1-1) cell were transfected with pEF1α-mRFP for 4h, and then observed by microscopy.
				Time (minutes) of mRFP expression after the onset of chromosome segregation
	sample	time (min)
	1	190	190		time (min)	cell number
		130	130		ー
		95	95		80	0
		150	150		85	0
		135	135		90	3
		105	120		95	2
		120	120		100	5
		255	240		105	13
		120	120		110	2
		105	105		115	0
		90	90		120	33
	2	145	130		125	2
		105	120		130	6
		240	195		135	19
		120	150		140	1
		135	135		145	1
		165	180		150	17
		180	180		155	0
		225	225		160	0
		105	105		165	17
		135	135		170	0
	3	150	135		175	1
		120	120		180	10
		120	120		185	0
		105	105		190	2
		105	120		195	5
		120	135		200	0
	4	120	135		205	0
		120	120		210	2
		165	165		215	0
		165	120		220	0
	5	150	150		225	3
		240	255		230	0
		150	150		235	0
		150	165		240	4
		180	180		245	0
	6	135	135		250	0
		165	165		255	4
	7	130	140		260	0
		90	100		265	0
		110	110		270	4
		180	165		275	1
		120	120		280	0
		150	150		285	3
		150	165		295	0
		120	120		300	1
	8	135	135		305	0
		180	165		310	0
		150	150		315	0
		120	120		320	0
		150	165		325	0
	9	120	120		330	1
		270	270		335	0
	10	100	100		345	0
		120	120		350	0
		135	135		SUM	162
		135	135
	11	285	240
		255	255
		165	150
	12	125	125
		195	180
	13	270	270
		135	135
		105	105
		165	165
		150	165
	14	100	100
		105	105
		120	120
		285	285
		300	330
		120	120
	15	210	225
		180	210
		195	195
	16	120	120
		165	195
		130	130
		175	275
		165	180
	N		162
	SUM		24985
	AVE		154.228
	MEDIAN		135
