# Supplementary material for: Transfected plasmid DNA is incorporated into the nucleus via nuclear envelope reformation at telophase
Source: Research Square preprint supplement (doi:10.21203/rs.3.rs-478612/v1), 2021-07-01
Supplement: Supplementary file 3 [file 5a2d5eca94f12b3c62a6e498.xlsx]

## Sheet: GFP-BAF_iBAF
				HeLa/GFP-BAF cells were treated with siRNA iBAF, and transfected with pEF1alpha-mRFP. RFP expression was observed by microscopy.
				Time (min) of RFP ecpression after onset of chromosome segregation
	sample	time (min)				iBAF	iLuc
	1	120	120		time (min)	cell number	cell number
		220	220		0	0	0
		160	160		10	0	0
	2	250	310		20	0	0
	3	110	110		30	0	0
		90	90		40	0	0
		170	180		50	0	0
		260	280		60	0	0
	4	90	-		70	0	0
		170	170		80	0	0
	5	130	130		90	3	0
		130	-		100	0	2
		190	190		110	6	0
	6	150	150		120	5	12
		170	220		130	4	12
	7	110	110		140	2	10
		280	300		150	6	2
	8	110	110		160	4	2
	10	220	220		170	6	0
		160	160		180	5	2
	11	120	120		190	2	2
		250	250		200	2	0
	12	180	180		210	0	1
		140	140		220	5	0
	15	180	180		230	0	3
		150	150		240	0	0
	17	170	170		250	3	1
		120	130		260	1	0
		200	200		270	2	3
	18	270	270		280	2	0
		320	350		290	0	0
	19	150	150		300	1	0
					310	1	0
					320	1	0
	cell number		62		330	0	0
	SUM		11060		340	0	0
	AVE		178.387		350	1	0
	MEDIAN		170		360	0	0
					370	0	0
					380	0	0
					390	0	0
					400	0	0
					410	0	0
					420	0	0
					430	0	0
					440	0	0
					450	0	0
					460	0	0
					470	0	0
					480	0	0
							0
							0
					SUM	62

## Sheet: GFP-BAF_iLuci 
				HeLa/GFP-BAF cells were treated with control siRNA iLuc, and transfected with pEF1alpha-mRFP. RFP expression was observed by microscopy.
				Time (min) of RFP ecpression after onset of chromosome segregation
	sample	time (min)			time (min)	cell number
	2	160	160		0	0
		140	140		10	0
	15	100	100		20	0
		120	120		30	0
	18	130	130		40	0
	1	140	140		50	0
	3	120	120		60	0
	4	130	130		70	0
	6	130	130		80	0
		120	120		90	0
		270	270		100	2
		230	230		110	0
		190	190		120	12
	10	130	130		130	12
		180	180		140	10
	11	150	150		150	2
	12	120	120		160	2
		140	140		170	0
		140	140		180	2
	14	210	230		190	2
	15	120	120		200	0
	20	140	140		210	1
		120	120		220	0
	21	130	130		230	3
		130	130		240	0
	22	250	270		250	1
					260	0
					270	3
	cell number		52		280	0
	SUM		7920		290	0
	AVE		152.308		300	0
	MEDIAN		135		310	0
					320	0
					330	0
					340	0
					350	0
					360	0
					370	0
					380	0
					390	0
					400	0
					410	0
					420	0
					430	0
					440	0
					450	0
					460	0
					470	0
					480	0
					490	0
					500	0
					SUM	52
